# Supplementary figures and images for: Fingerprint Finder: Identifying Genomic Fingerprint Sites in Cotton Cohorts for Genetic Analysis and Breeding Advancement
Source: MDPI journal article supplement (doi:10.3390/genes15030378), 2024-03-19

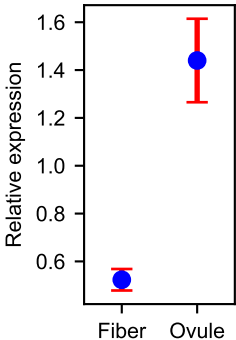

Supplement: s1 [file s1]
